# Supplementary material
Source: publisher figshare collection journal article supplement (https://acs.figshare.com/ndownloader/files/3826819)
Supplement: Supplementary file 1 [file 3826819]

## **Supporting Information**

### **Modulation of pore sizes of titanium dioxide photocatalysts by a facile template free hydrothermal synthesis method: Implications for photocatalytic degradation of rhodamine B**

Shivatharsiny Rasalingam, Chia-Ming Wu, and Ranjit T. Koodali\*

*Department of Chemistry, University of South Dakota, Vermillion, SD 57069*

Tel #: 605-677-6189

Fax #: 605-677-6397

E-mail: [Ranjit.Koodali@usd.edu](mailto:Ranjit.Koodali@usd.edu)

\* Corresponding Author

**Table S1. Optimal instrumental conditions for ESI-MS studies.**

| Parameters                  | Optimal values/conditions |
|-----------------------------|---------------------------|
| Infusion rate               | 10 $\mu\text{Lmin}^{-1}$  |
| Spray Shield voltage        | 600 V                     |
| Mode                        | Positive                  |
| Mass range ( $m/z$ )        | 50-500                    |
| Capillary voltage           | 80 V                      |
| Drying gas temperature      | 400 $^{\circ}\text{C}$    |
| Nebulizer pressure          | 10 psi                    |
| Needle voltage              | 5000 V                    |
| Detector                    | Dynode ion detector       |
| Electron multiplier voltage | 1360 V                    |

**Table S2. Dye degradation rate constants of TiO<sub>2</sub> materials.**

| <b>Sample</b> | <b><math>k_{app} \times 10^{-5} [s^{-1}]</math></b> | <b><math>R^2</math></b> |
|---------------|-----------------------------------------------------|-------------------------|
| Ti-HTS-40     | 25.9                                                | 0.991                   |
| Ti-HTS-90     | 59.8                                                | 0.985                   |
| Ti-HTS-150    | 96.9                                                | 0.933                   |
| Ti-HTS-210    | 97.9                                                | 0.962                   |
| Ti-HTS-240    | 109.8                                               | 1.000                   |

Ti-HTS refers to TiO<sub>2</sub> hydrothermal synthesized materials and the following number denotes the hydrothermal treatment temperature in °C.  $k_{app}$  is the photocatalytic pseudo first-order degradation rate constant.

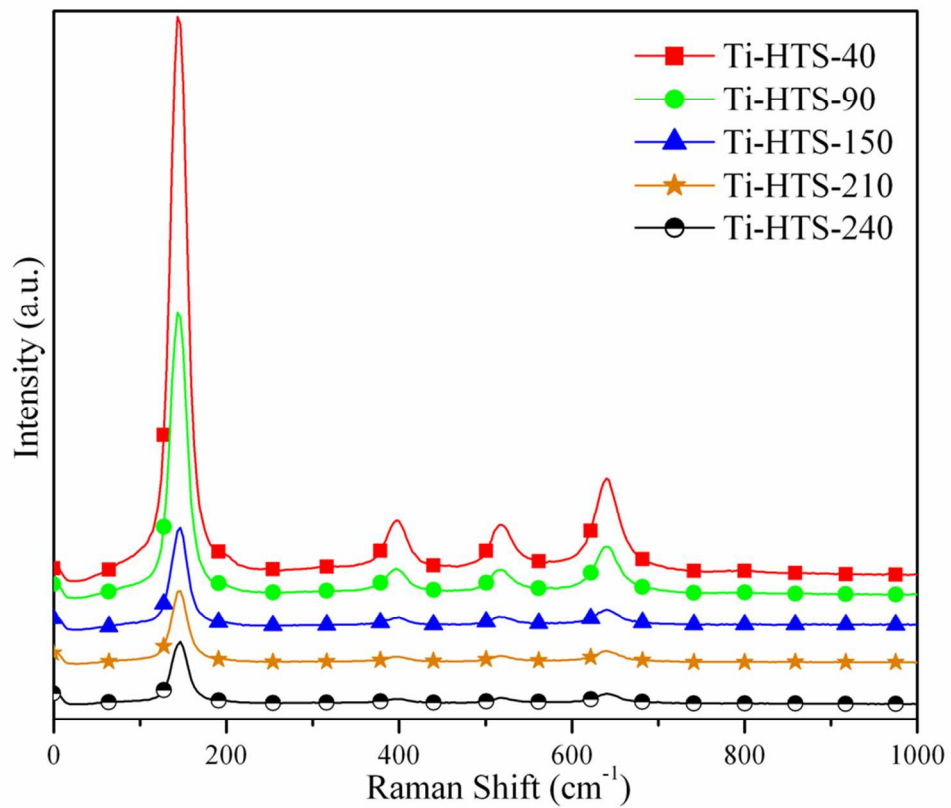

**Fig. S1.** Raman spectra of TiO<sub>2</sub> materials prepared at different hydrothermal temperatures of 40, 90, 150, 210, and 240 °C.

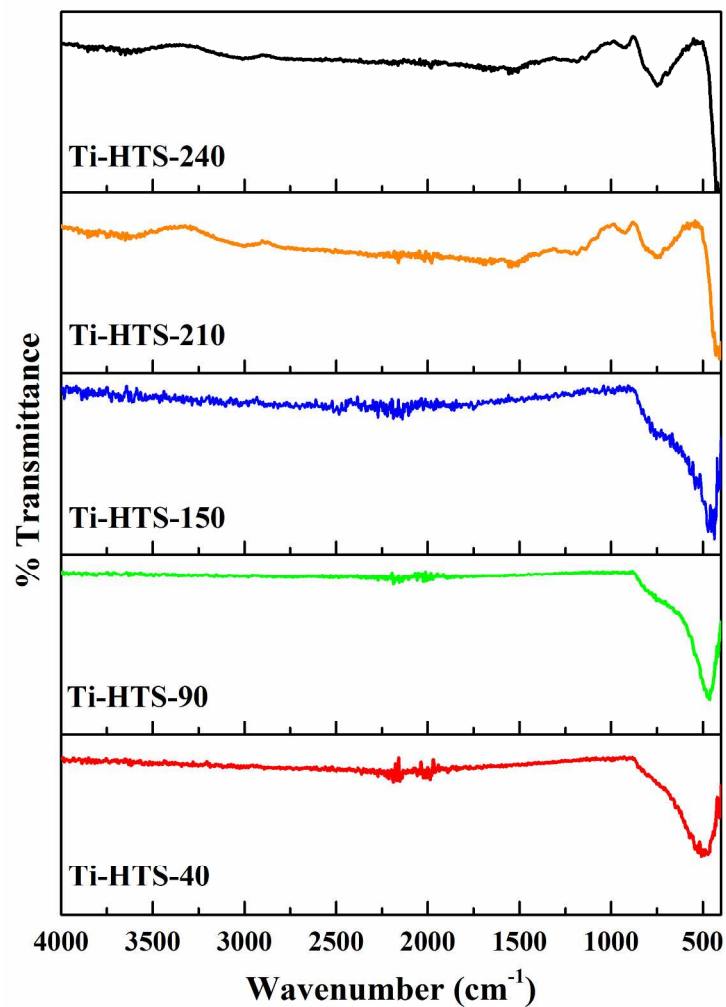

**Fig. S2.** FT-IR spectra of TiO<sub>2</sub> materials prepared at different hydrothermal temperatures 40, 90, 150, 210, and 240 °C.

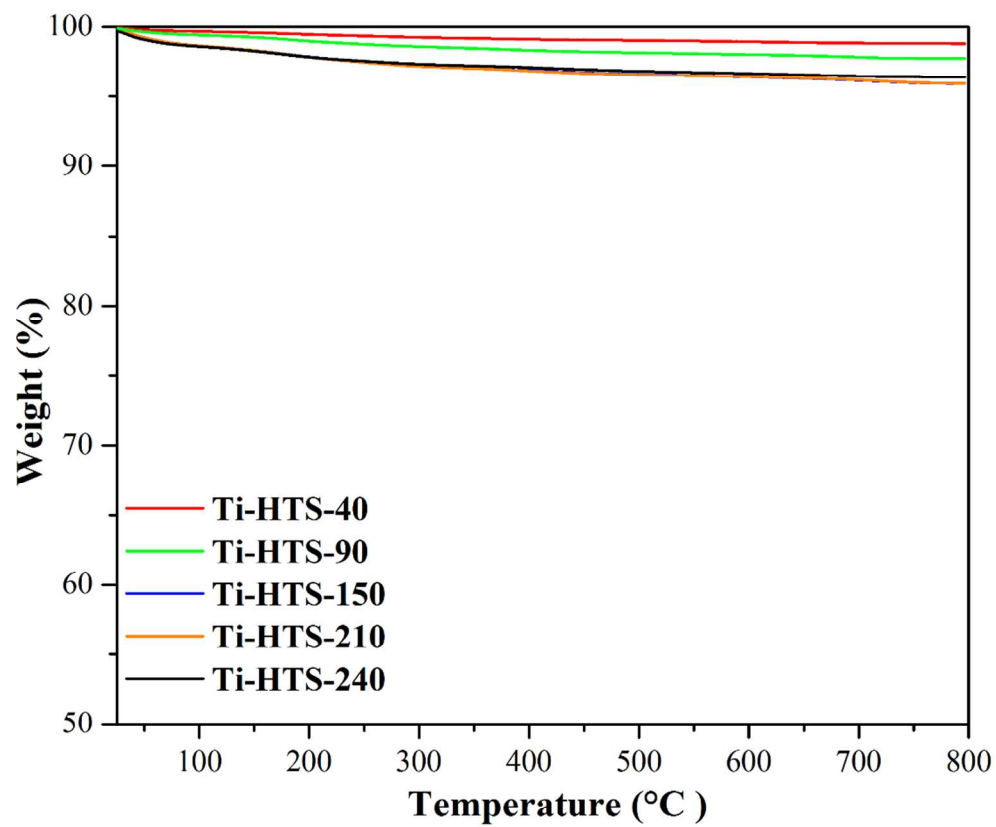

**Fig. S3.** TGA analysis of TiO<sub>2</sub> materials.

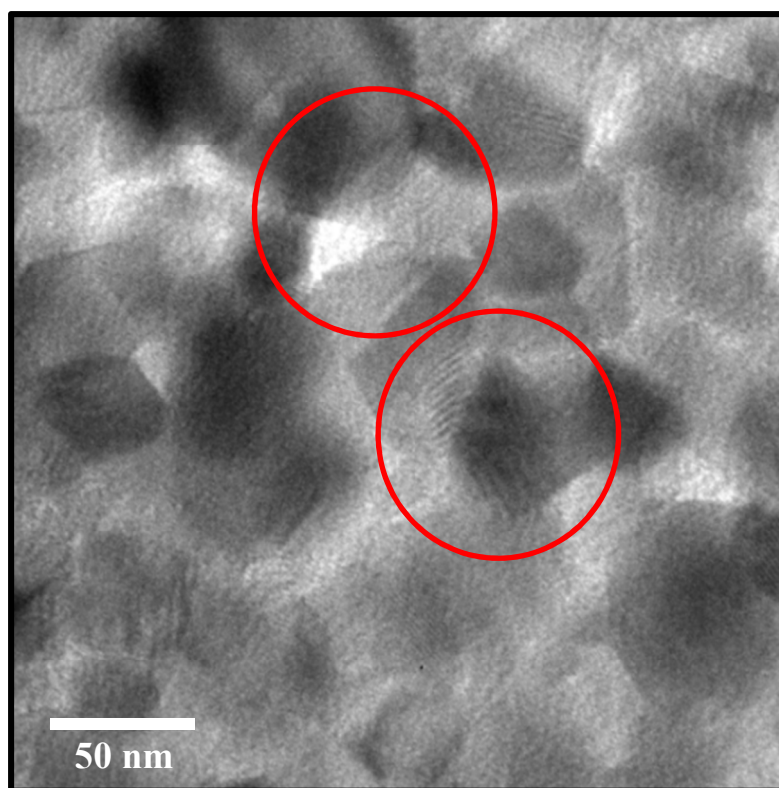

**Fig. S4.** TEM image of a representative TiO<sub>2</sub> material (Ti-HTS-40) prepared at the hydrothermal temperature of 40 °C.

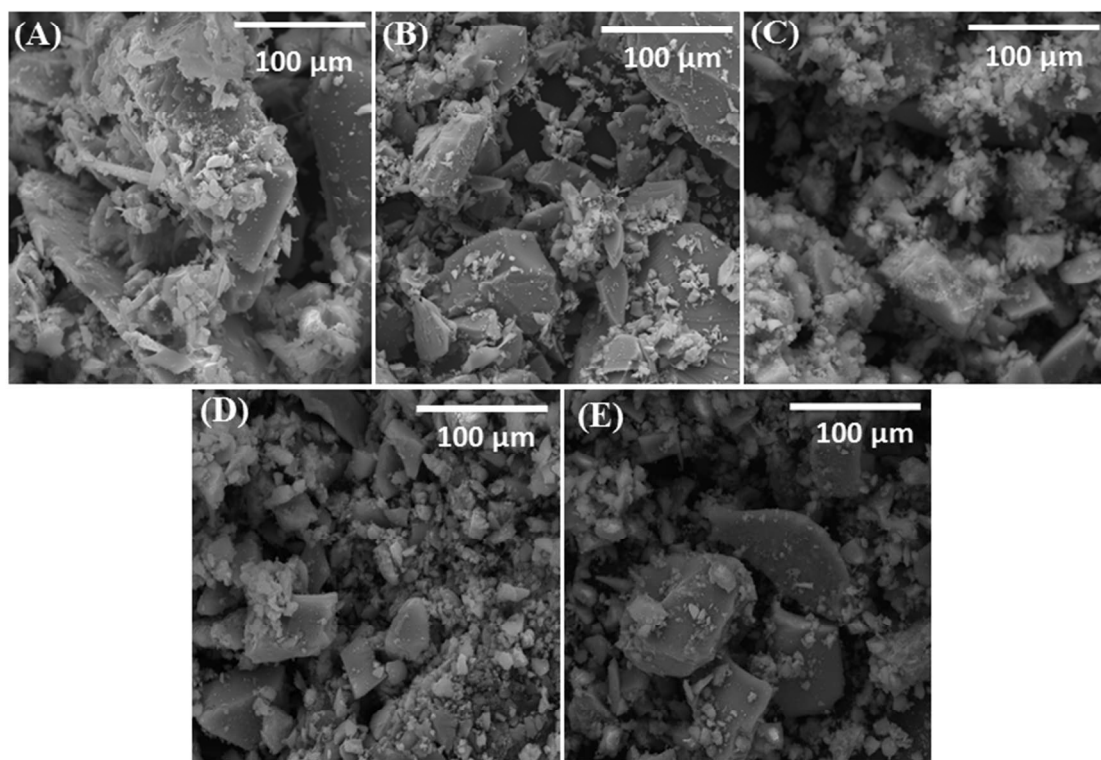

**Fig. S5.** SEM images of TiO<sub>2</sub> materials.



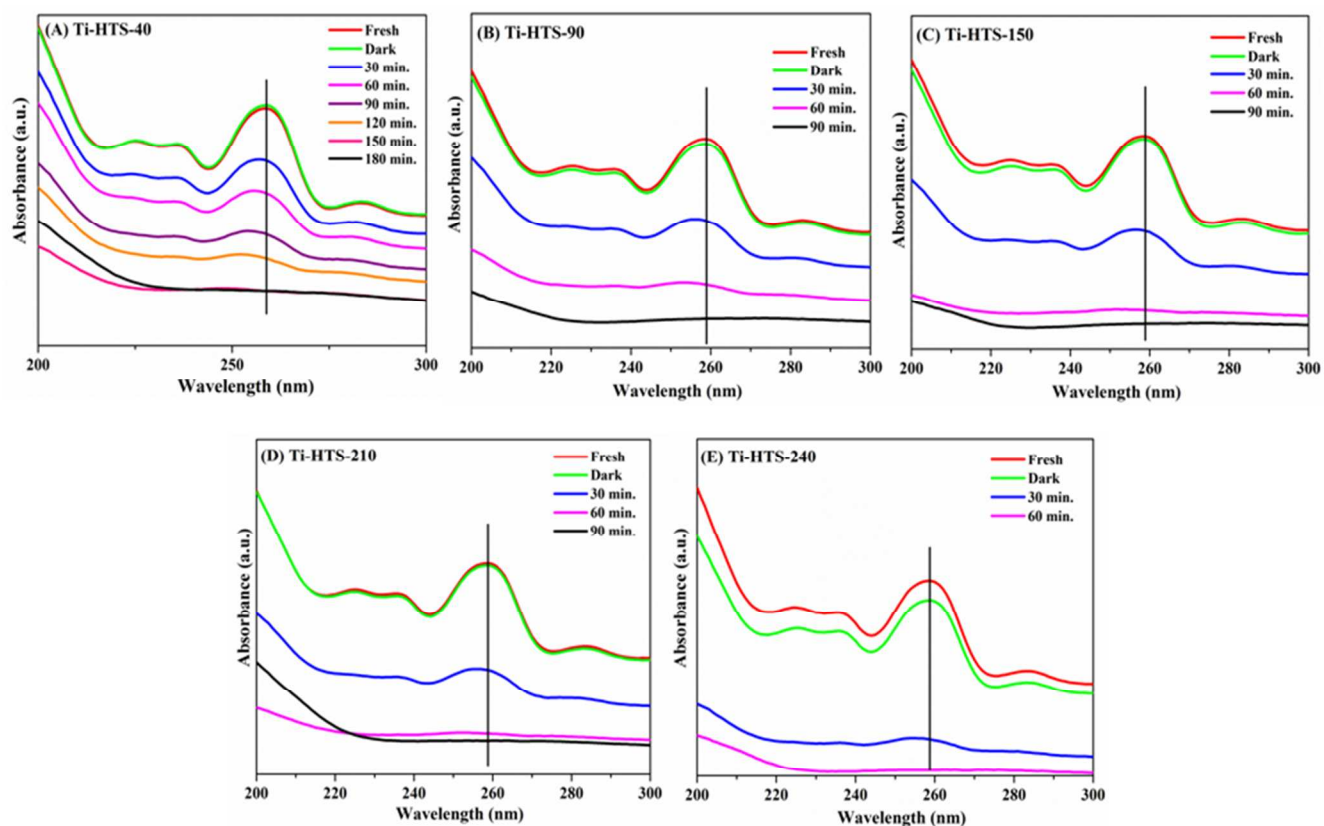

**Fig. S6.** Absorption spectra (aromatic region) of RhB dye degraded under visible light irradiation for 6 h using (A) Ti-HTS-40, (B) Ti-HTS-90, (C) Ti-HTS-150, (D) Ti-HTS-210, and (E) Ti-HTS-240 prepared at different hydrothermal temperatures of 40, 90, 150, 210, and 240 °C respectively

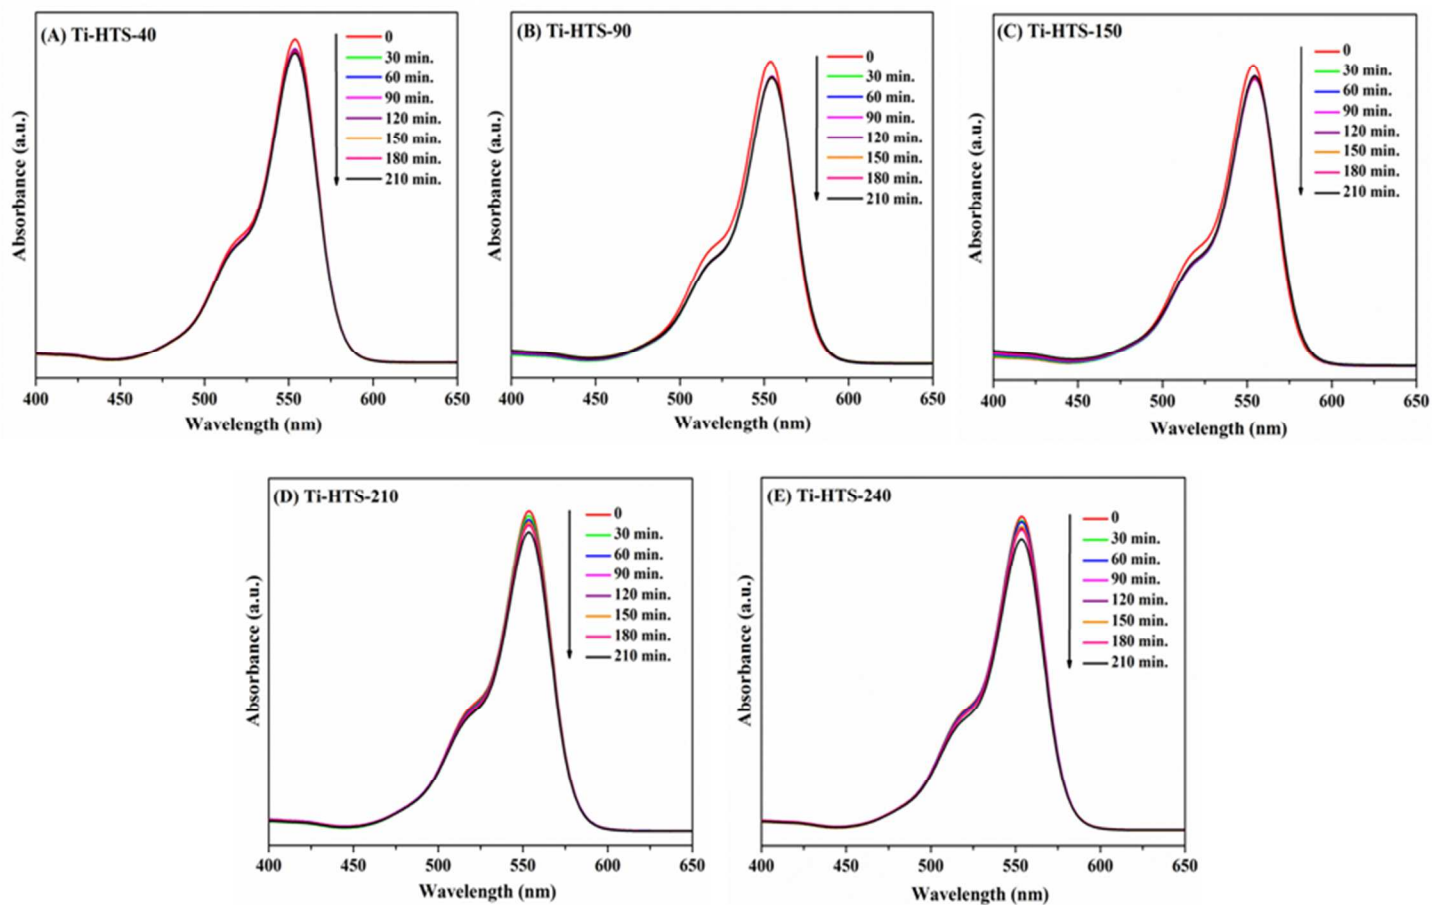

**Fig. S7.** Absorption spectra of RhB after dark adsorption with time for (A) Ti-HTS-40, (B) Ti-HTS-90, (C) Ti-HTS-150, (D) Ti-HTS-210, and (E) Ti-HTS-240

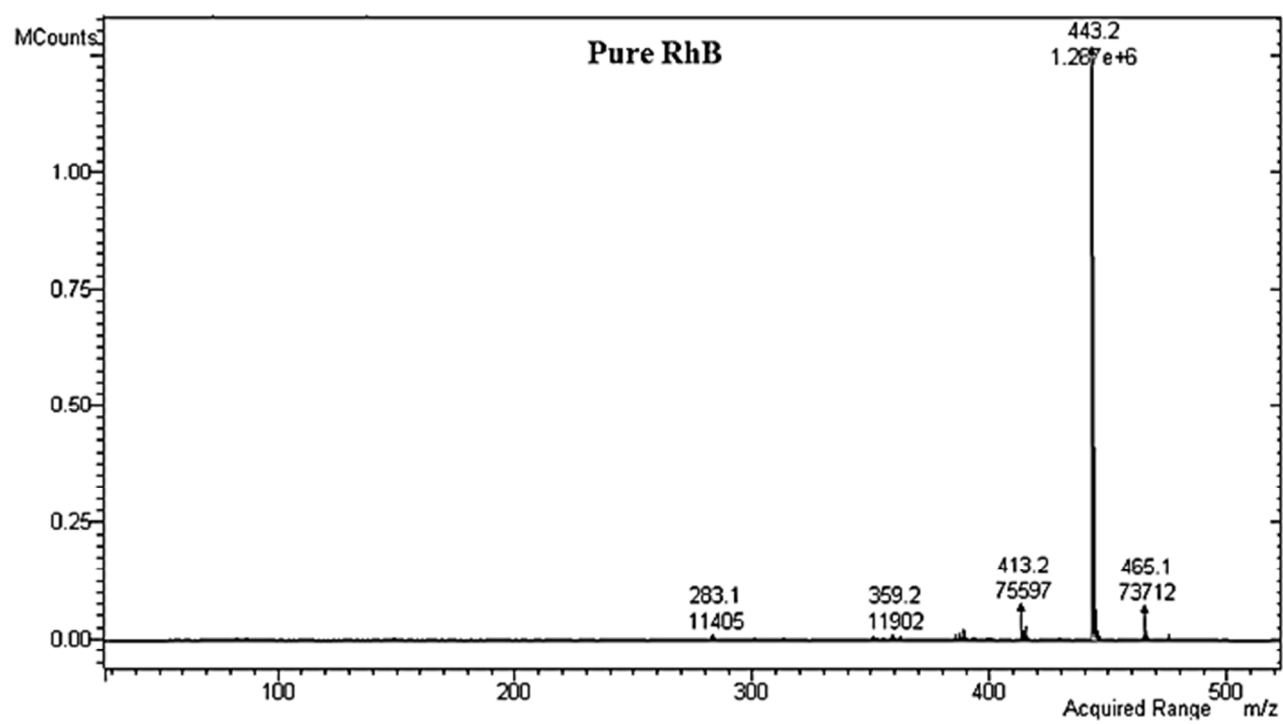

**Fig. S8.** ESI-MS of Pure RhB.

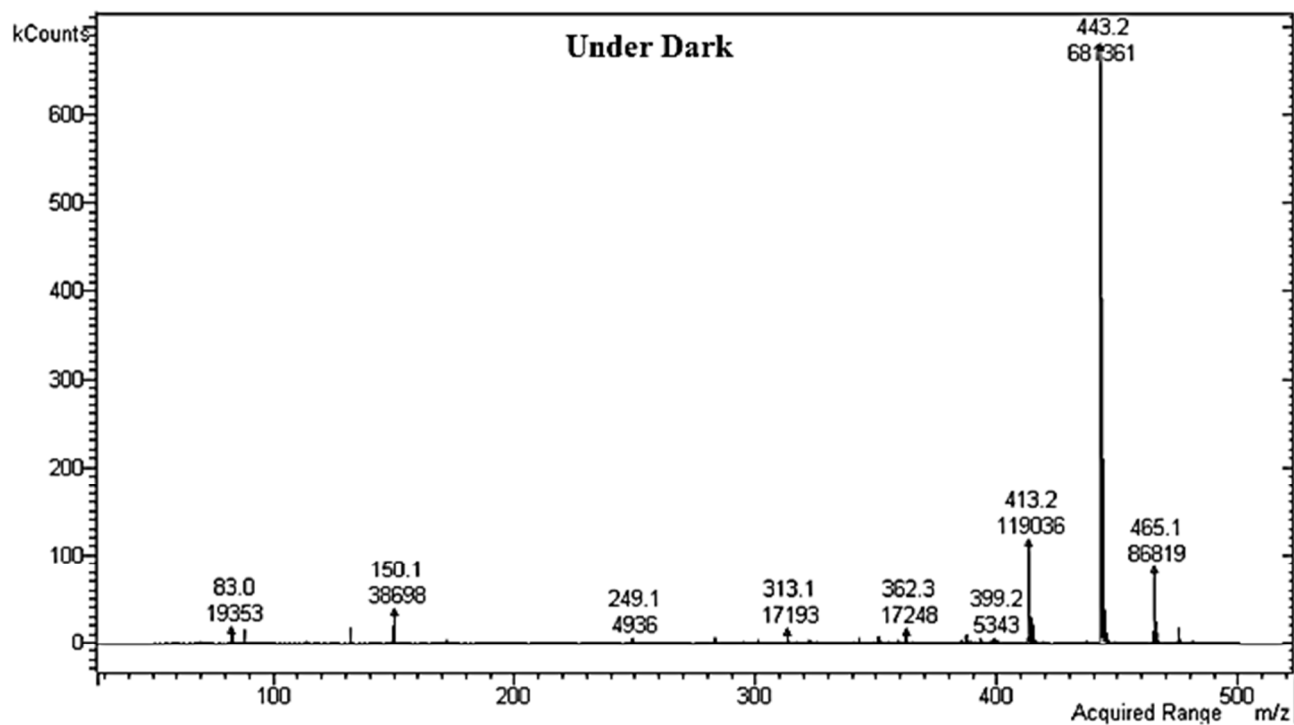

**Fig. S9.** ESI-MS of RhB solution after dark adsorption over Ti-HTS-40.

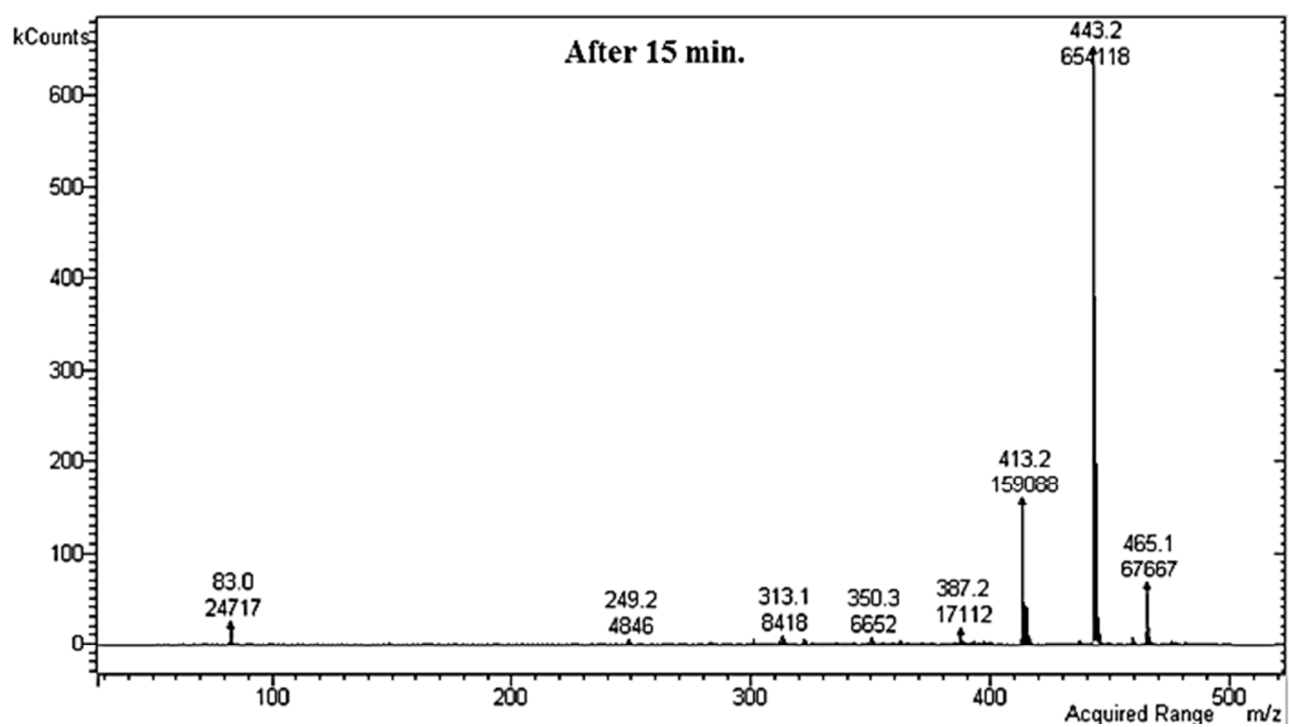

**Fig. S10.** ESI-MS of RhB solution after 15 min. of photocatalytic reaction with Ti-HTS-40.

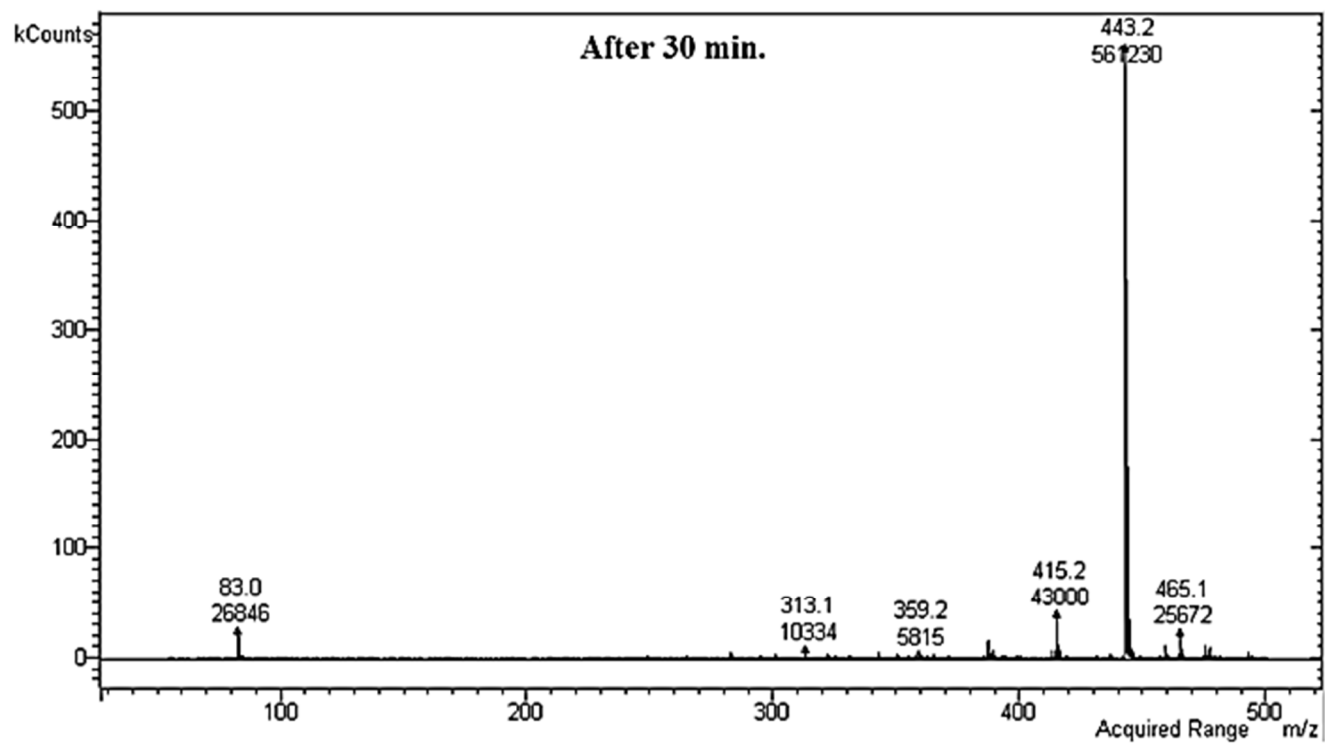

**Fig. S11.** ESI-MS of RhB solution after 30 min. of photocatalytic reaction with Ti-HTS-40.

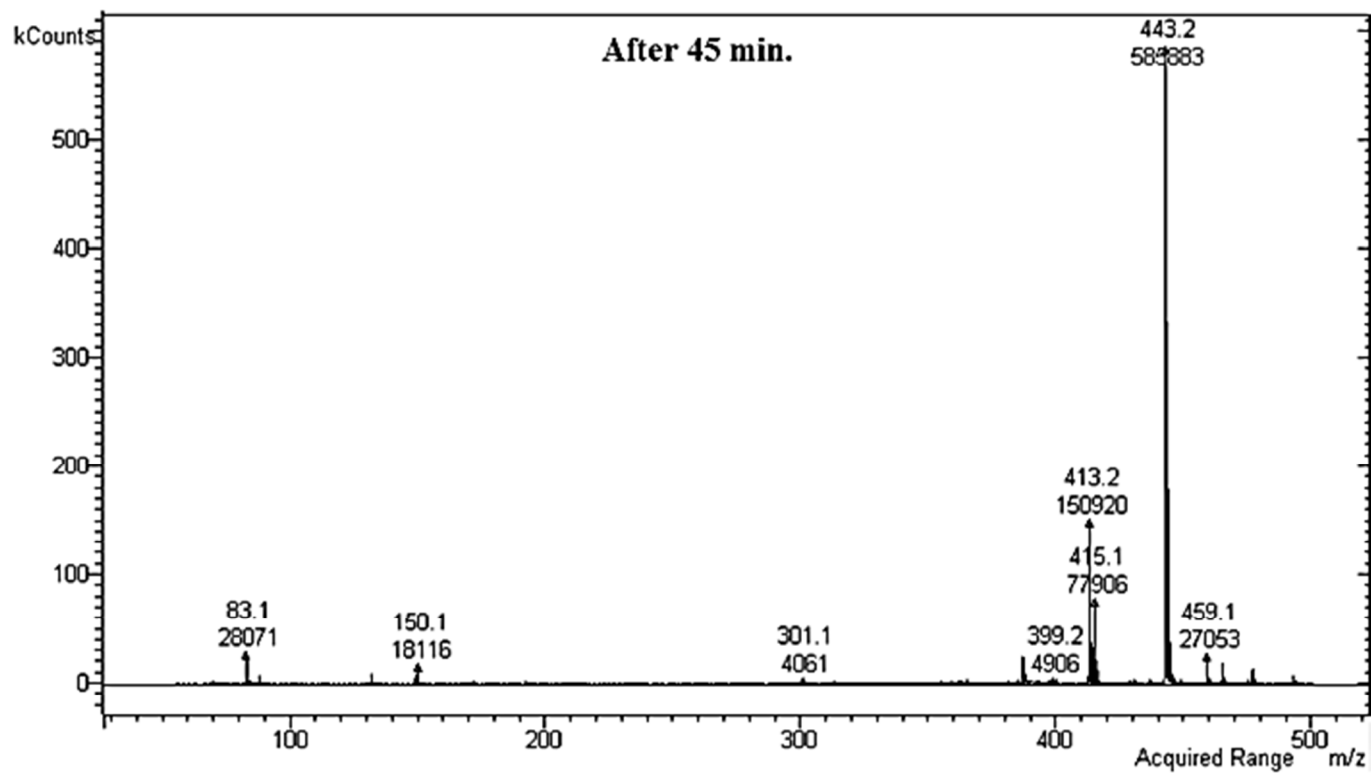

**Fig. S12.** ESI-MS of RhB solution after 45 min. of photocatalytic reaction with Ti-HTS-40.

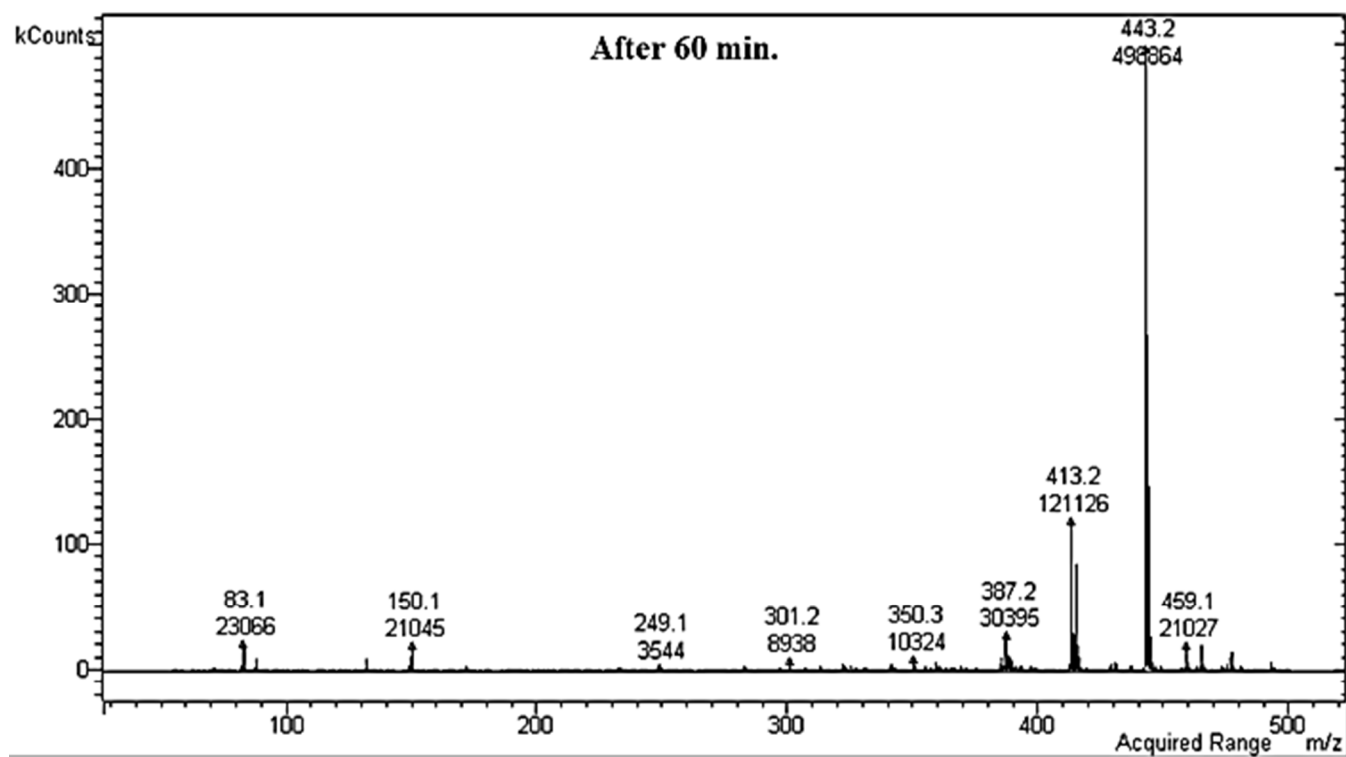

**Fig. S13.** ESI-MS of RhB solution after 60 min. of photocatalytic reaction with Ti-HTS-40.



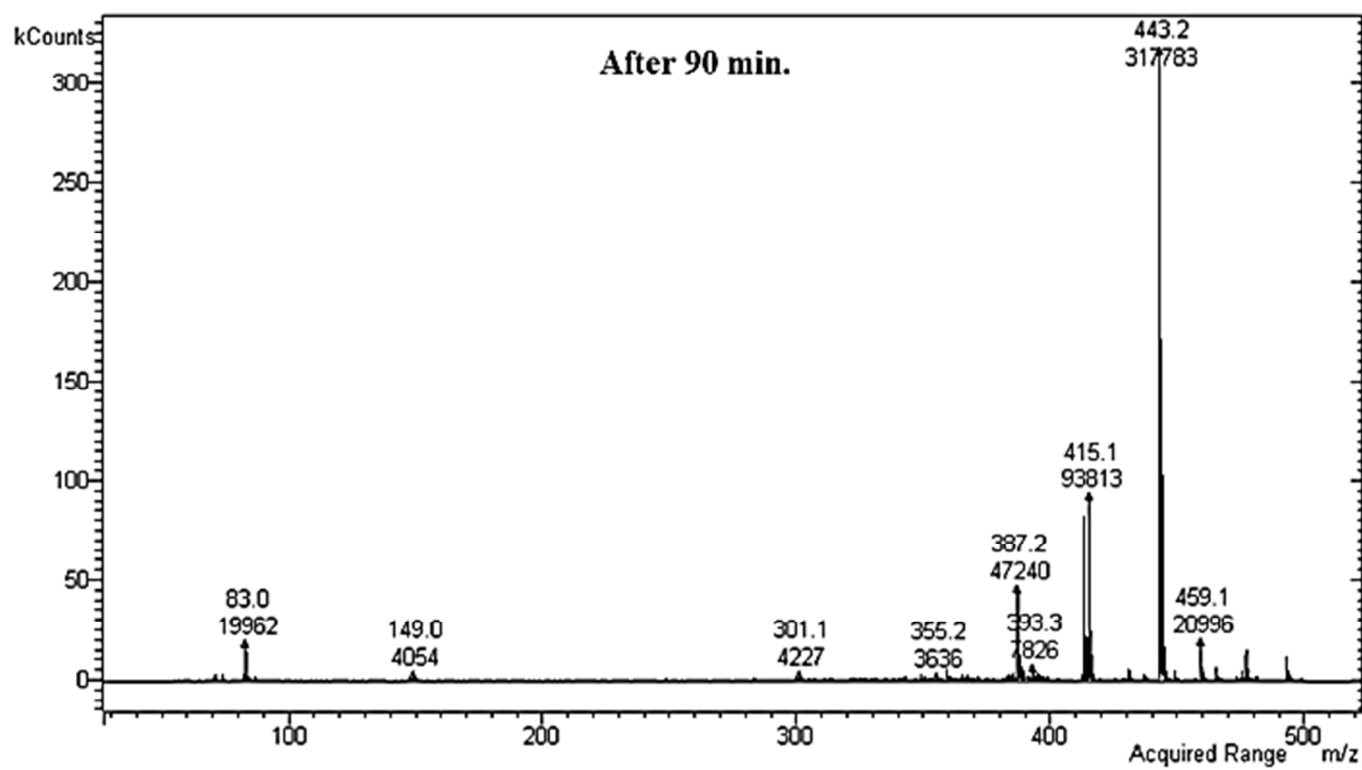

**Fig. S14.** ESI-MS of RhB solution after 90 min. of photocatalytic reaction with Ti-HTS-40.

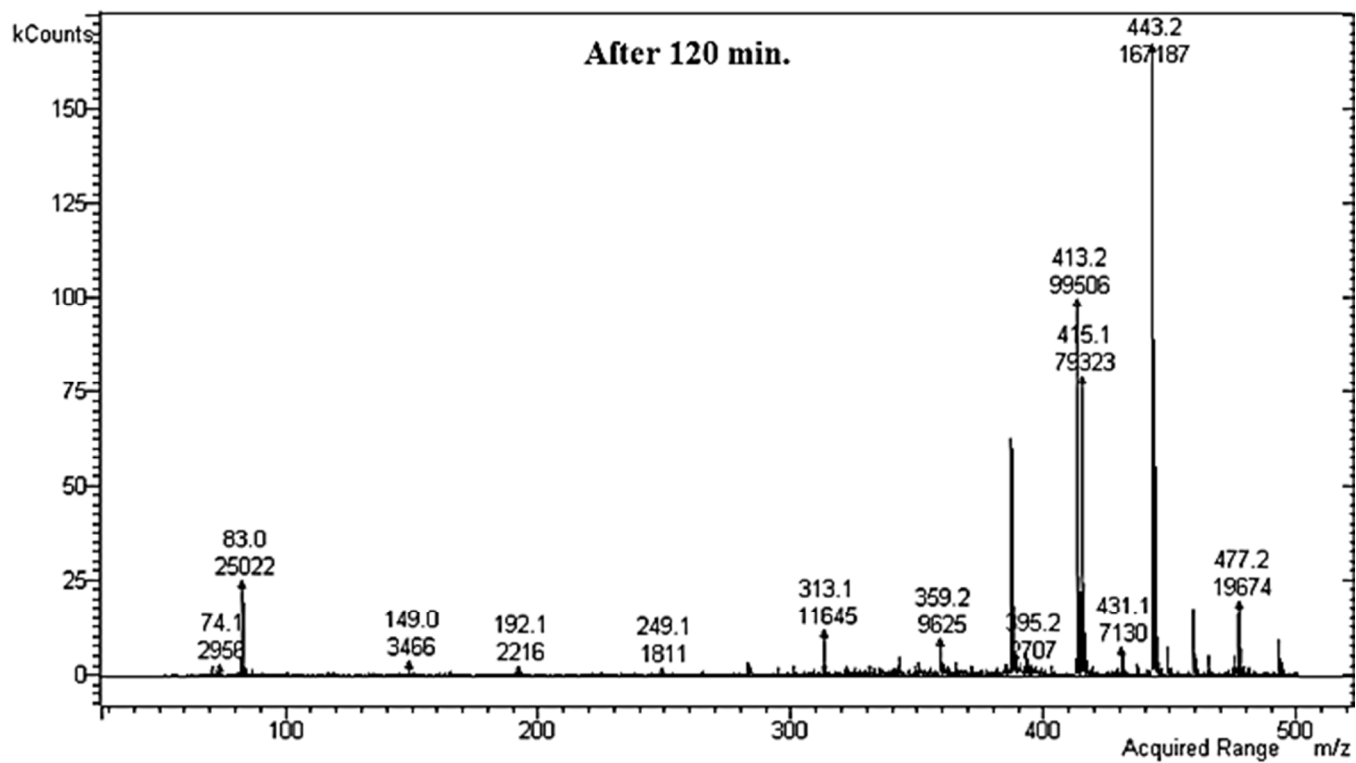

**Fig. S15.** ESI-MS of RhB solution after 120 min. of photocatalytic reaction with Ti-HTS-40.

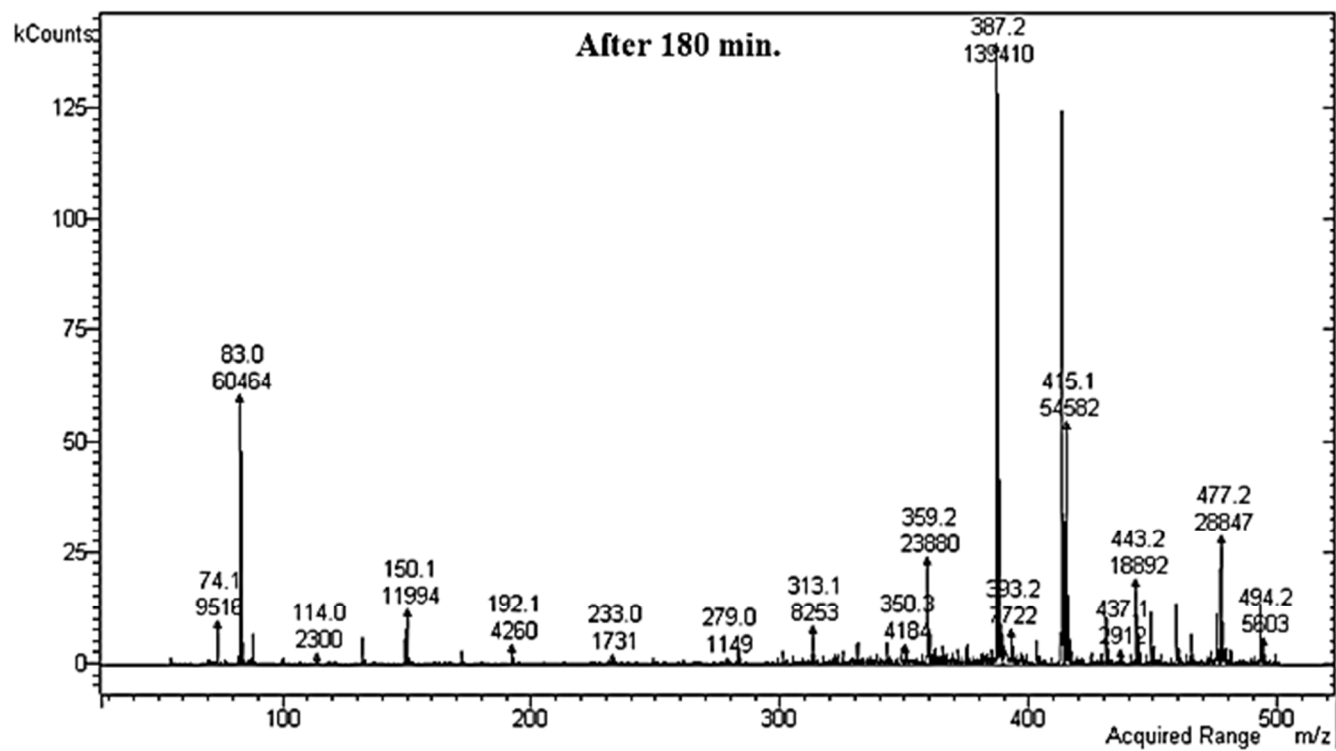

**Fig. S16.** ESI-MS of RhB solution after 180 min. of photocatalytic reaction with Ti-HTS-40.

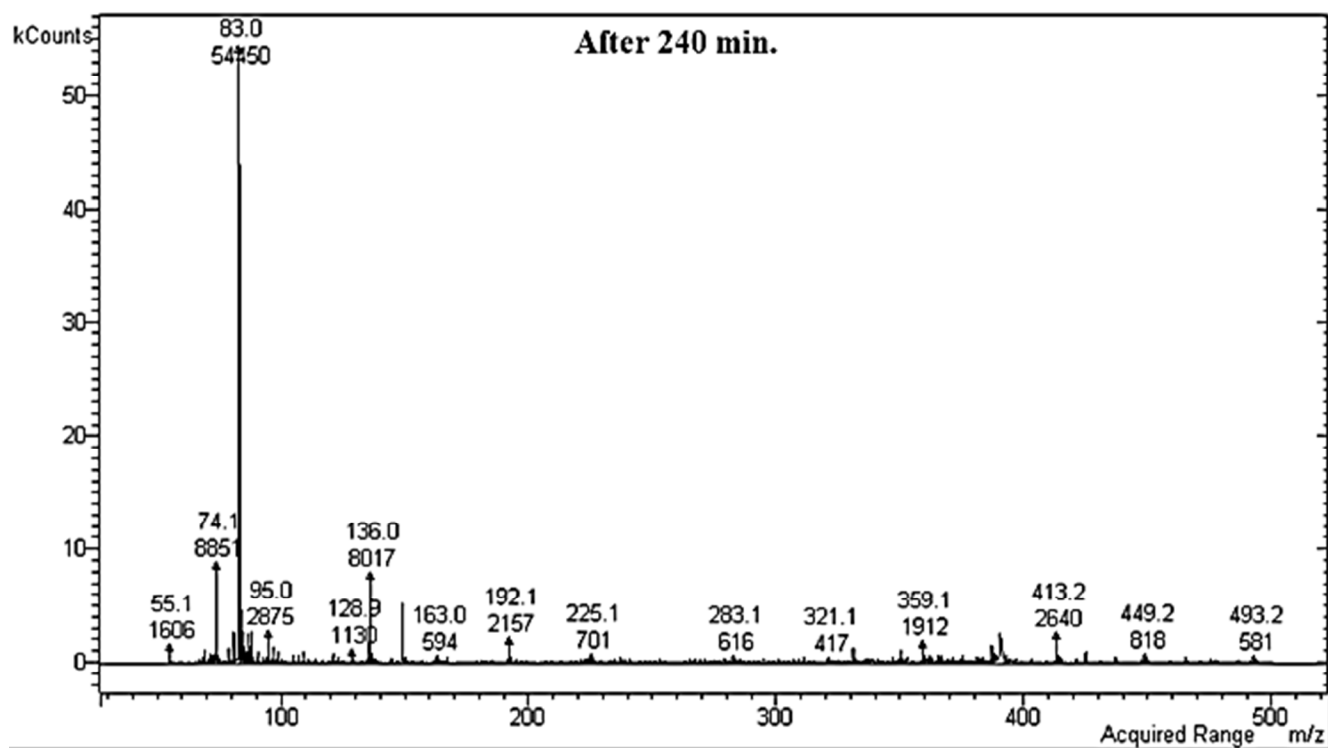

**Fig. S17.** ESI-MS of RhB solution after 240 min. of photocatalytic reaction with Ti-HTS-40.

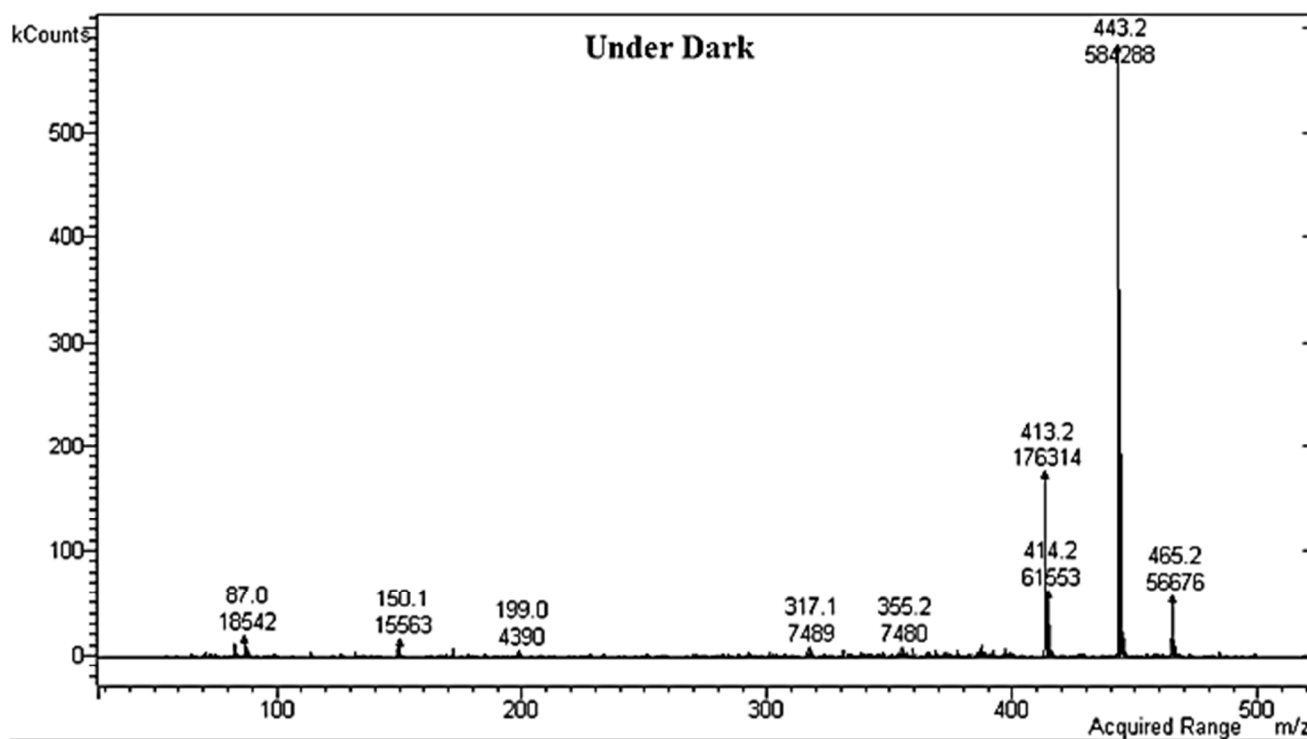

**Fig. S18.** ESI-MS of RhB solution after dark adsorption over Ti-HTS-240.

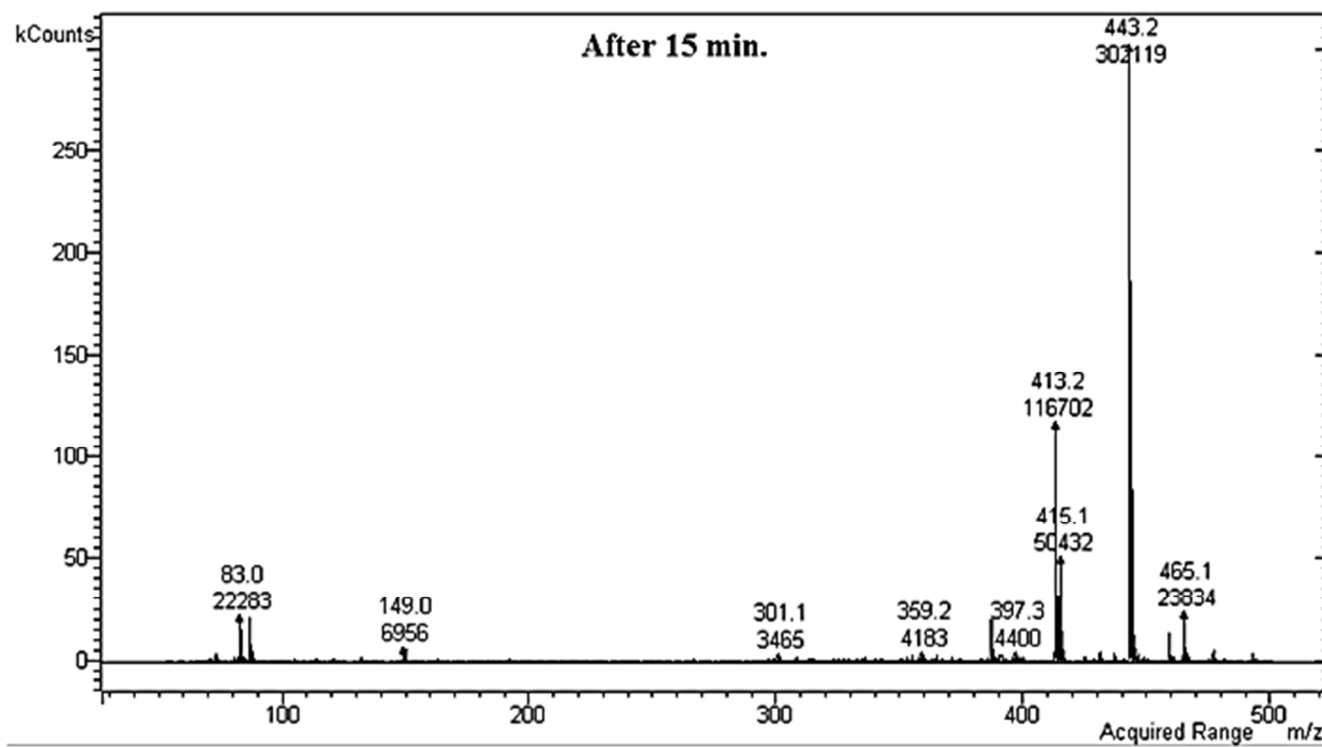

**Fig. S19.** ESI-MS of RhB solution after 15 min. of photocatalytic reaction with Ti-HTS-240.

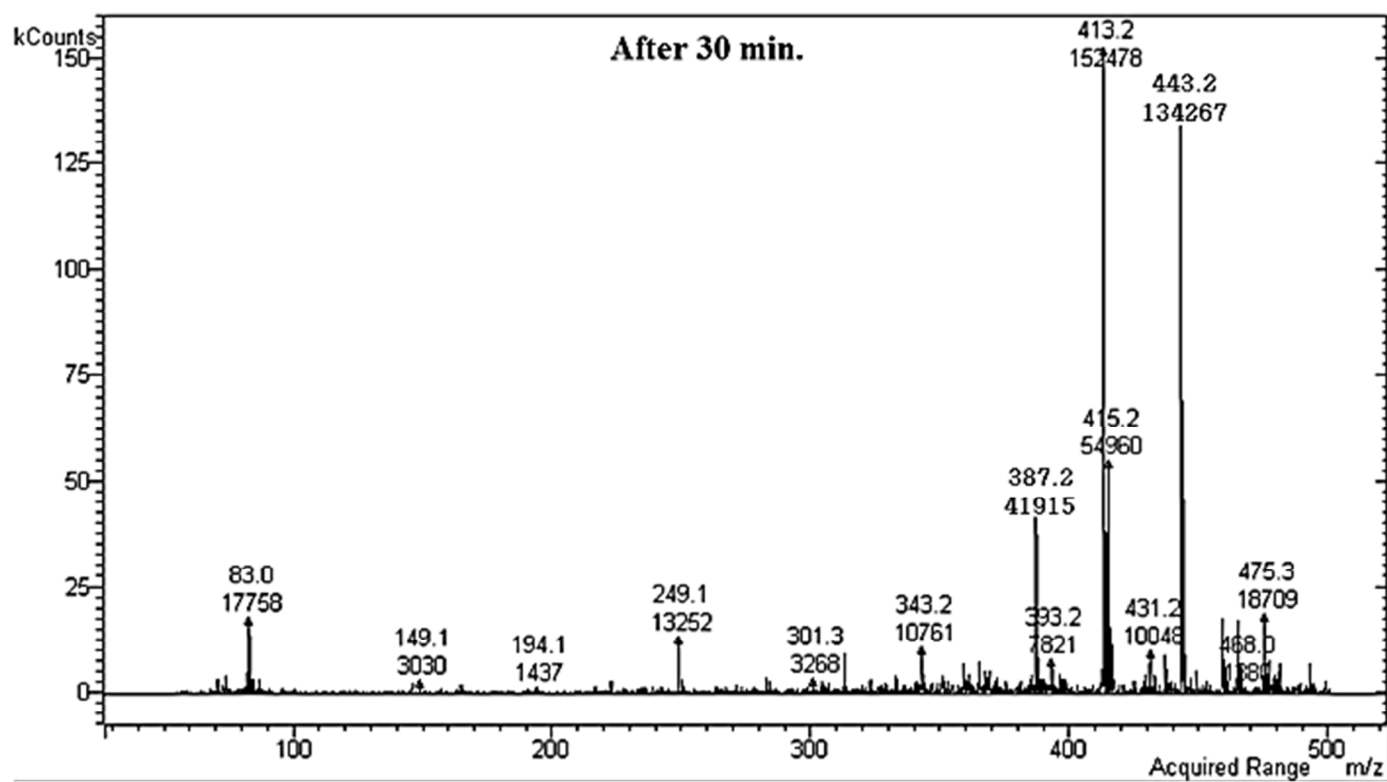

**Fig. S20.** ESI-MS of RhB solution after 30 min. of photocatalytic reaction with Ti-HTS-240.

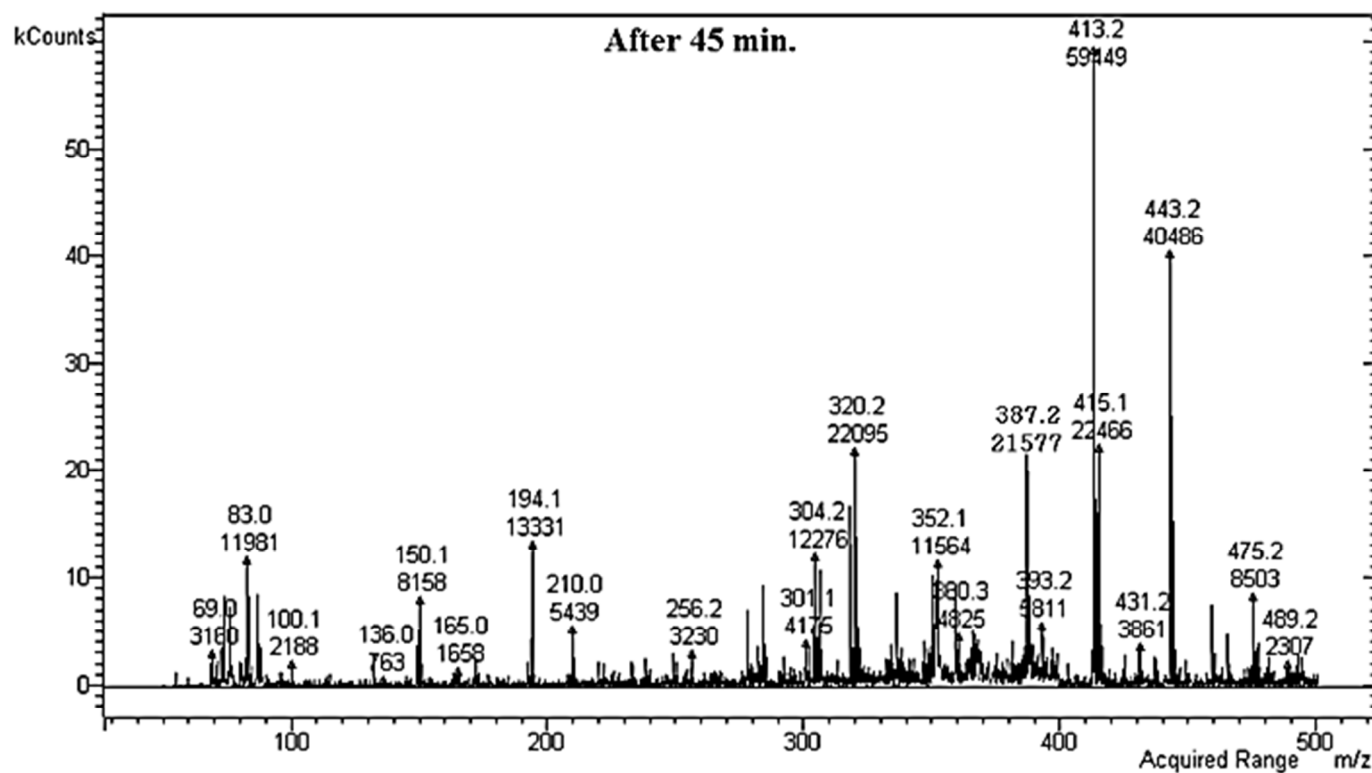

**Fig. S21.** ESI-MS of RhB solution after 45 min. of photocatalytic reaction with Ti-HTS-240.



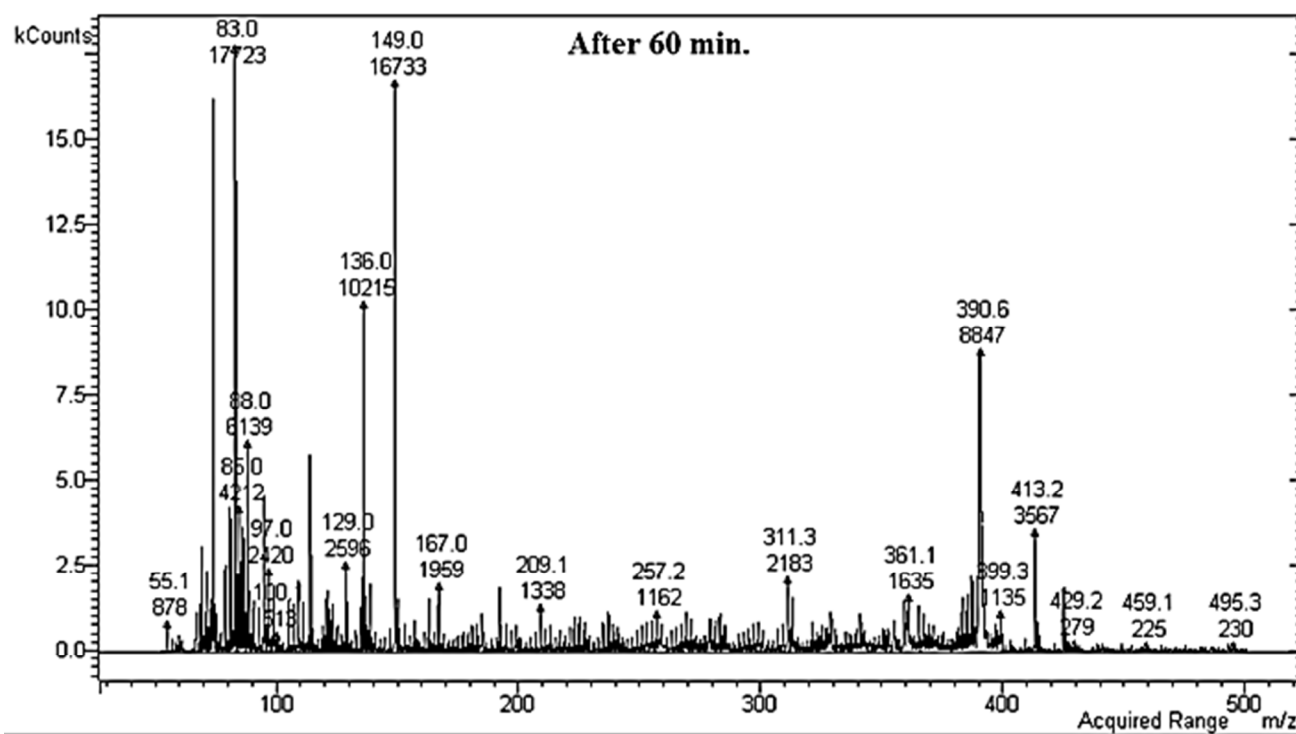

**Fig. S22.** ESI-MS of RhB solution after 60 min. of photocatalytic reaction with Ti-HTS-240.

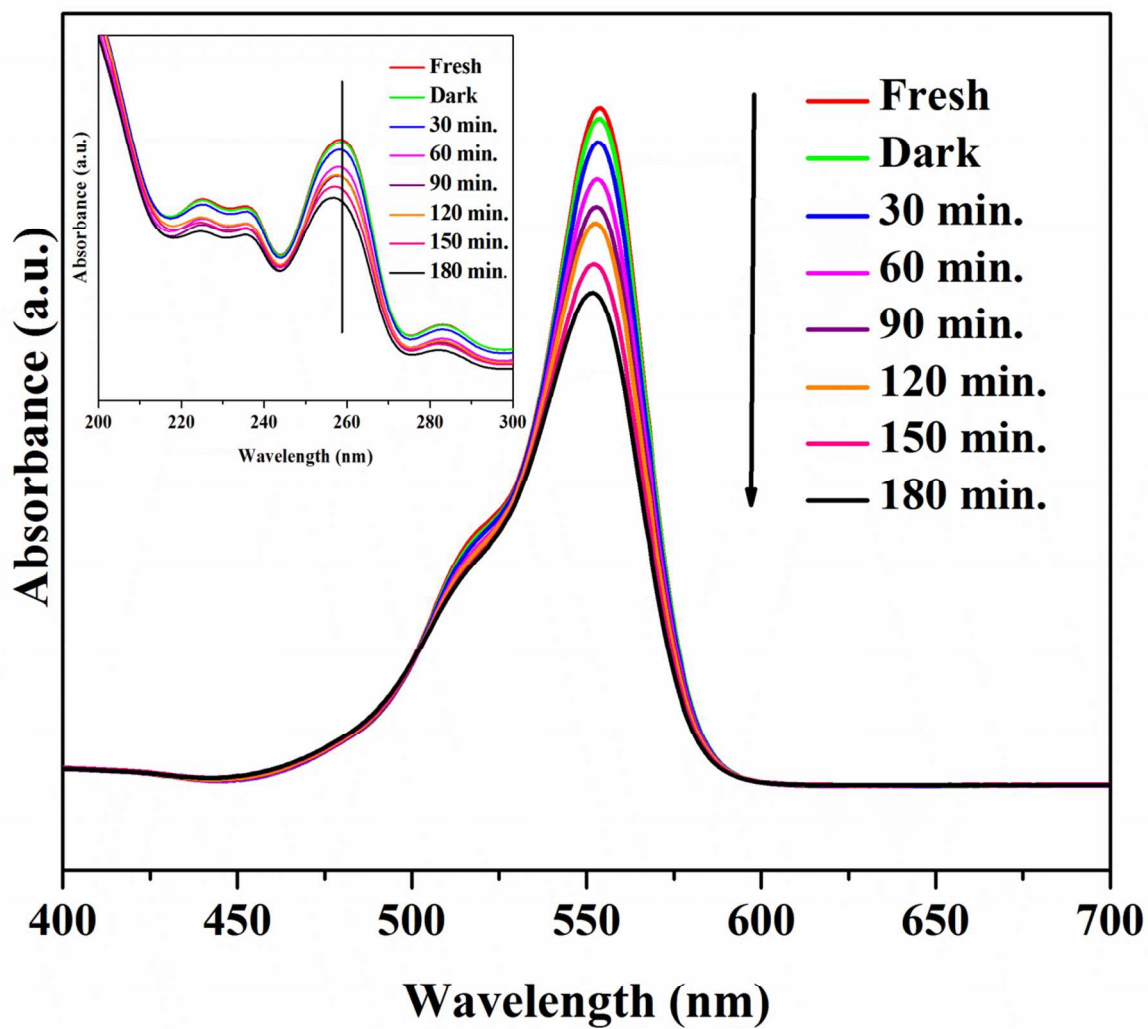

**Fig. S23.** UV-Vis spectra of RhB filtrate after visible light irradiation under N<sub>2</sub> flow for Ti-HTS-240. Inset shows the absorbance spectra for the aromatic region of RhB.

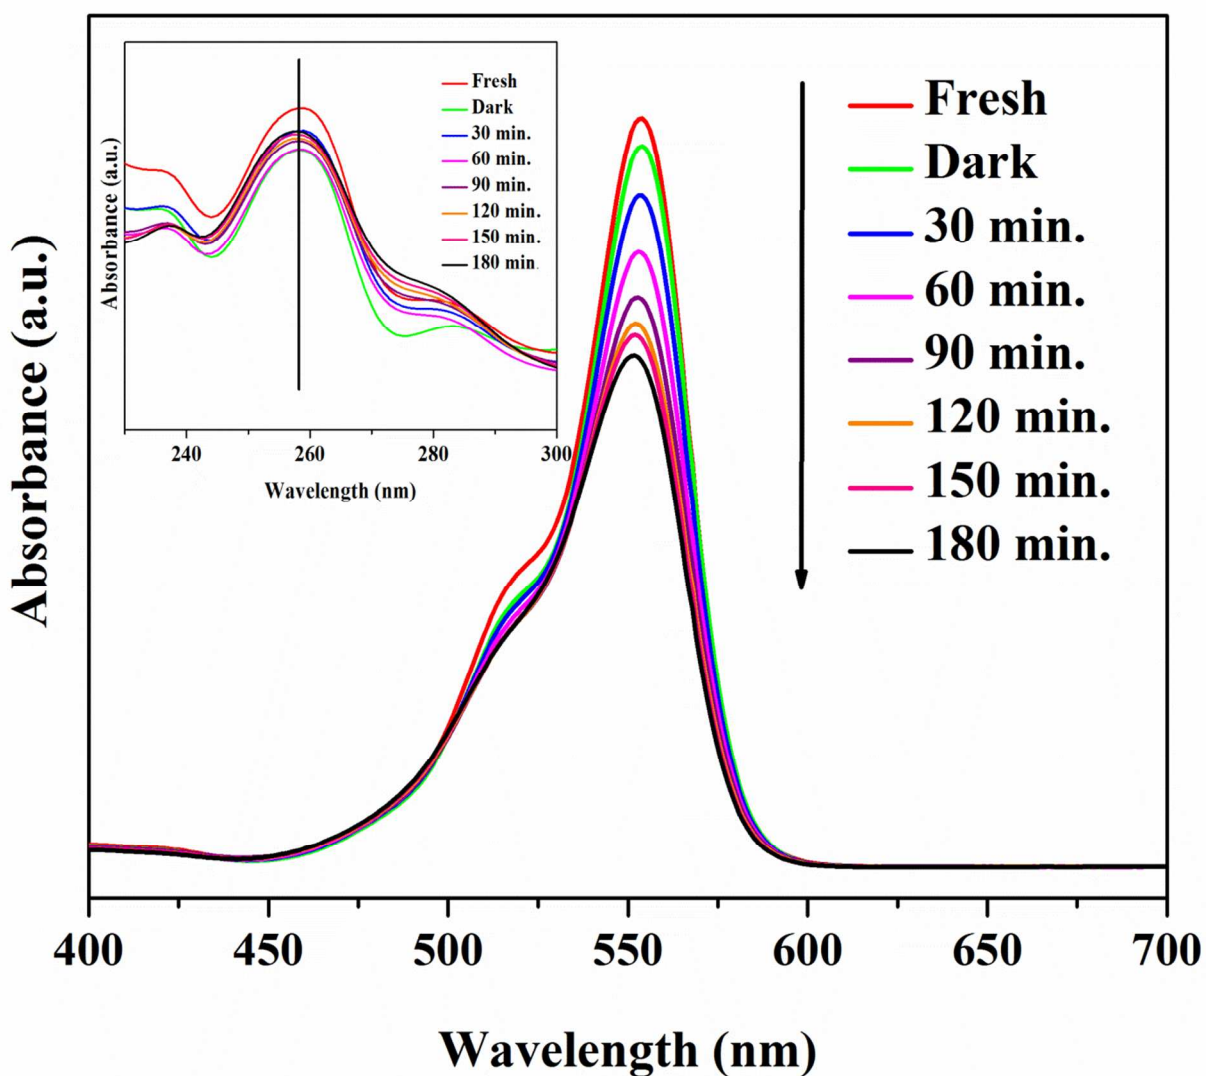

**Fig. S24.** UV-Vis spectra of RhB filtrate after visible light irradiation for Ti-HTS-240 in the presence of isopropyl alcohol (IPA). Inset shows the absorbance spectra for the aromatic region of RhB.
